# Supplementary material for: Near-IR nanolignin sensitizers based on pyrene-conjugated chlorin and bacteriochlorin for ROS generation, DNA intercalation and bioimaging
Source: Royal Society of Chemistry journal article supplement (doi:10.1039/d4tb01627k), 2024-10-21
Supplement: d4tb01627k1.pdf [file d4tb01627k1.pdf]

## Supporting Information

### Near-IR Nanolignin Sensitizers Based on Pyrene Conjugated Chlorin and Bacteriochlorin for ROS Generation, DNA Intercalation and Bioimaging

**Kunal Gogde,<sup>a,b</sup> Seema Kirar,<sup>a</sup> Anil Kumar Pujari,<sup>a,c</sup> Devesh Mohne,<sup>a</sup> Ashok Kumar Yadav,<sup>b</sup>  
and Jayeeta Bhaumik<sup>a\*</sup>**

*<sup>a</sup>Department of Bioproduct Chemistry, Center of Innovative and Applied Bioprocessing,  
Department of Biotechnology (Govt. of India), Knowledge City, Sector 81, Mohali 140308, Punjab*

*<sup>b</sup>University Institute of Pharmaceutical Sciences (UIPS), Panjab University, Sector 14, Chandigarh  
160014*

*<sup>c</sup>Indian Institute of Science Education and Research (IISER), Knowledge City, Sector 81, Mohali  
140306, Punjab*

Corresponding author's email address: [jayeeta@ciab.res.in](mailto:jayeeta@ciab.res.in), [jbhaumi@gmail.com](mailto:jbhaumi@gmail.com)

## Table of Contents

|                                                                                          |         |
|------------------------------------------------------------------------------------------|---------|
| S1. Chemicals and instruments.....                                                       | S3      |
| S2. Reaction modification/optimization.....                                              | S4      |
| S3. Characterization data.....                                                           | S4–S14  |
| S3.1 <sup>1</sup> H and <sup>13</sup> C-NMR spectra.....                                 | S5      |
| S3.2 Mass spectra.....                                                                   | S6–S9   |
| S3.3 High performance liquid chromatography.....                                         | S9–S10  |
| S3.4 UV-Vis spectra.....                                                                 | S11     |
| S3.2 Zeta potential.....                                                                 | S11     |
| S3.3 Loading efficiency (%).....                                                         | S12     |
| S3.4 Stability studies.....                                                              | S13–S14 |
| S4. Singlet oxygen quantification graphs.....                                            | S15     |
| S5. Photoluminescence studies.....                                                       | S16     |
| S6. Morphological observation of <i>Candida albicans</i> before and after treatment..... | S16     |
| S7. Intracellular ROS generation analysis.....                                           | S17     |

## S1. Chemicals and instruments

**Chemicals.** The chemicals/reagents/solvents were purchased from CDH Chemicals, SRL Chemicals, TCI Chemicals (India) Pvt. Ltd., and Sigma-Aldrich; Merck Chemicals, Germany. These chemicals and reagents were used without purification. The analytical grade solvents were used in the column chromatography. The characterization of *meso*-phenyl dipyrromethane (**5**) and 1,9-Diformyl-5-(4-phenyl)dipyrromethane (**6**) was consistent with previously reported data.<sup>1</sup> The column chromatography of PyChl (**9a**) and PyBac (**9b**) was performed on silica gel (100-200 mesh). Solvent system: Petroleum ether and dichloromethane (DCM) [ratio 3:1].

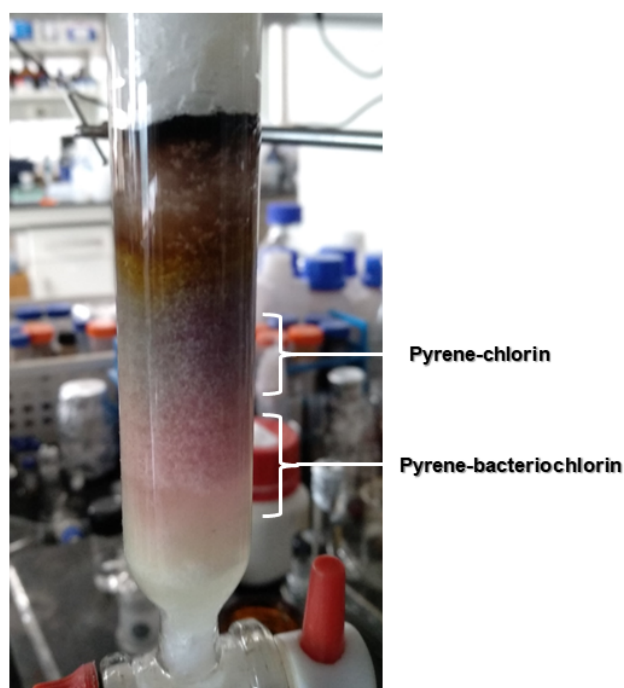

**Figure S1.** Digital photograph of column chromatography of the photosensitizers. The first pink band was identified as pyrene-bacteriochlorin (**9b**), and the second green band was identified as pyrene-chlorin (**9a**).

**Instruments and equipment.** The microwave-assisted reactions were performed using the microwave synthesizer (CEM Discover system; Model no. 908010). <sup>1</sup>H and <sup>13</sup>C NMR spectra were recorded on a Bruker Advance Neo 500 MHz NMR spectrometer at SAIF, Panjab University, Chandigarh. <sup>1</sup>H NMR was analyzed using DMSO-d<sub>6</sub> or CDCl<sub>3</sub> as solvents. The UV–Vis spectra were recorded on a Shimadzu UV-2600. The fluorescence emission spectra were recorded using a Cary Eclipse Fluorescence Spectrophotometer (Agilent) at CIF, CIAB Mohali. The mass spectra were recorded on an LC–MS Spectrometer Q-TOF Micro at SAIF, Panjab University, Chandigarh. The UPLC data were performed by the Waters Acquity UPLC system at CIF, CIAB Mohali. The solvents

(HPLC grade) were MillQ water (0.1% TFA, solvent A) and acetonitrile (0.1% TFA, solvent B). 0–20 min; isocratic solvent system (1:9), respectively. HPLC data were collected using Waters 1525 (Empower software) system (same solvent system as UPLC was used, except for PyBac in which no TFA was added). The mean particle size and zeta potential were determined by a zetasizer (Malvern; Nano 25) at CIF, CIAB Mohali. Transmission electron microscopy (FEI, USA) was performed at CIL, NIPER Mohali.

## S2. Reaction modification/optimization

**Table S1.** Optimization of diimide reduction conditions (using microwave synthesizer)

| Entry | Base<br>(100 eq.)                                         | Temperature<br>(°C) | Time (min) | Yield (%)  |            |
|-------|-----------------------------------------------------------|---------------------|------------|------------|------------|
|       |                                                           |                     |            | PyChl (9a) | PyBac (9b) |
| 1     | K <sub>2</sub> CO <sub>3</sub>                            | 120                 | 25         | 18 – 19    | 19 – 20    |
| 2     | K <sub>2</sub> CO <sub>3</sub>                            | 130                 | 25         | 19         | 22         |
| 3     | K <sub>2</sub> CO <sub>3</sub>                            | 120                 | 30         | 20         | 18         |
| 4     | K <sub>2</sub> CO <sub>3</sub>                            | 130                 | 30         | 20         | 20         |
| 5     | K <sub>2</sub> CO <sub>3</sub> (25 eq in<br>every 15 min) | 120                 | 60         | 9          | 10         |
| 6     | — <sup>a</sup>                                            | 120                 | 30         | 15         | 15         |
| 7     | — <sup>a</sup>                                            | 130                 | 30         | 18         | 19         |

<sup>a</sup> The reactions were not reproducible



### S3. Characterization data

#### S3.1 $^1\text{H}$ and $^{13}\text{C}$ -NMR spectra.

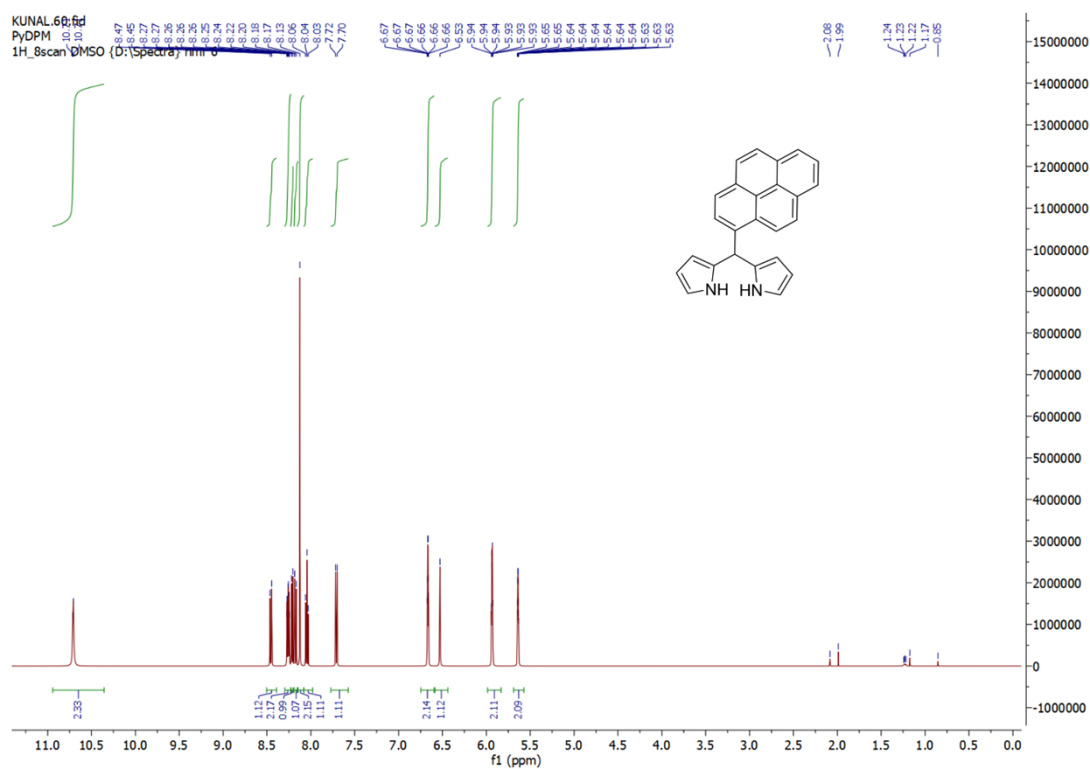

Figure S2.  $^1\text{H}$ -NMR spectrum of meso-pyrene dipyrromethane (3).

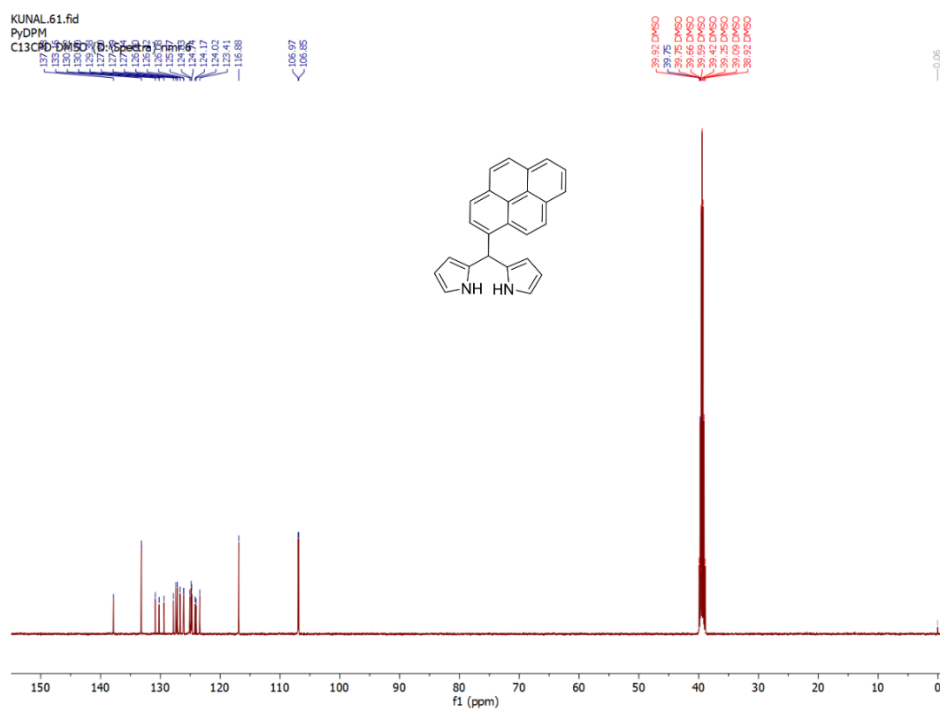

Figure S3.  $^{13}\text{C}$ -NMR spectrum of meso-pyrene dipyrromethane (3).

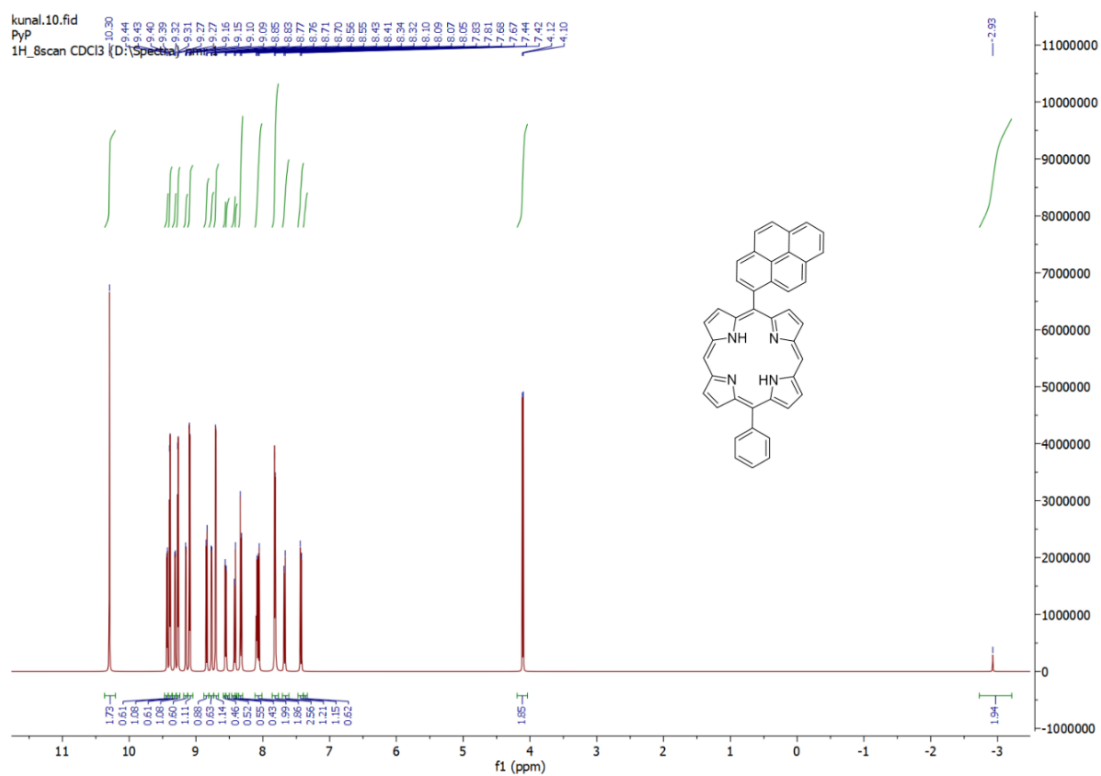

**Figure S4.**  $^1\text{H-NMR}$  spectrum of pyrene-porphyrin (8).

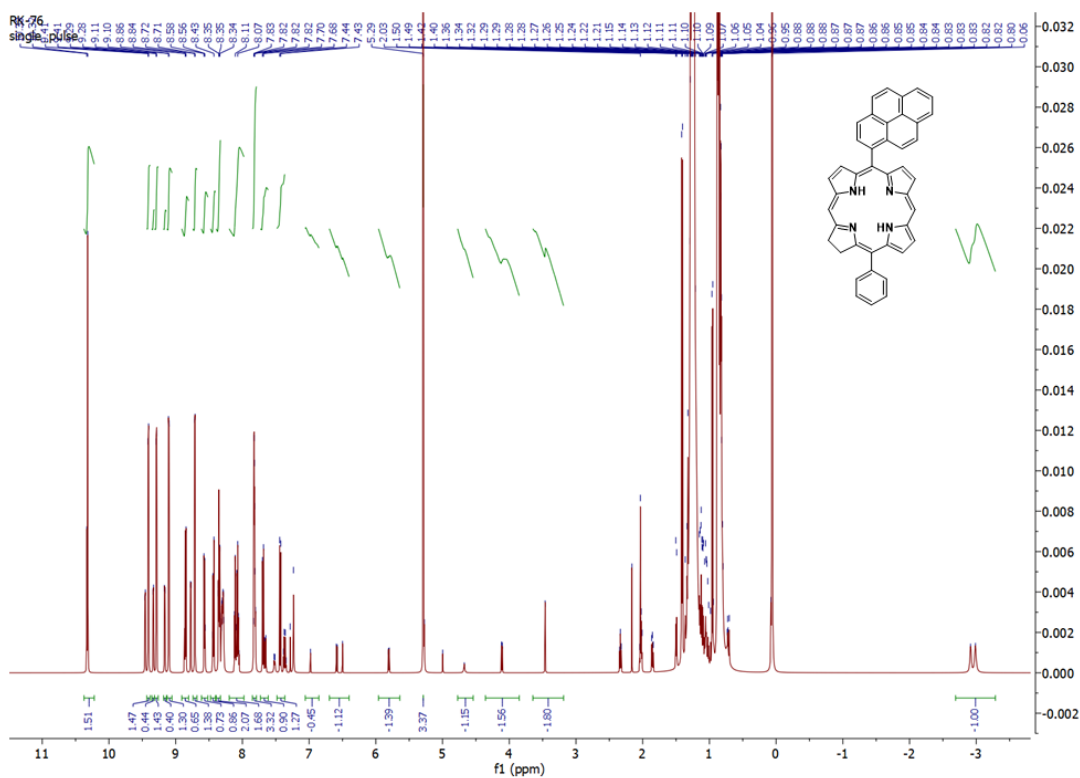

**Figure S5.**  $^1\text{H-NMR}$  spectrum of pyrene-chlorin (9a).

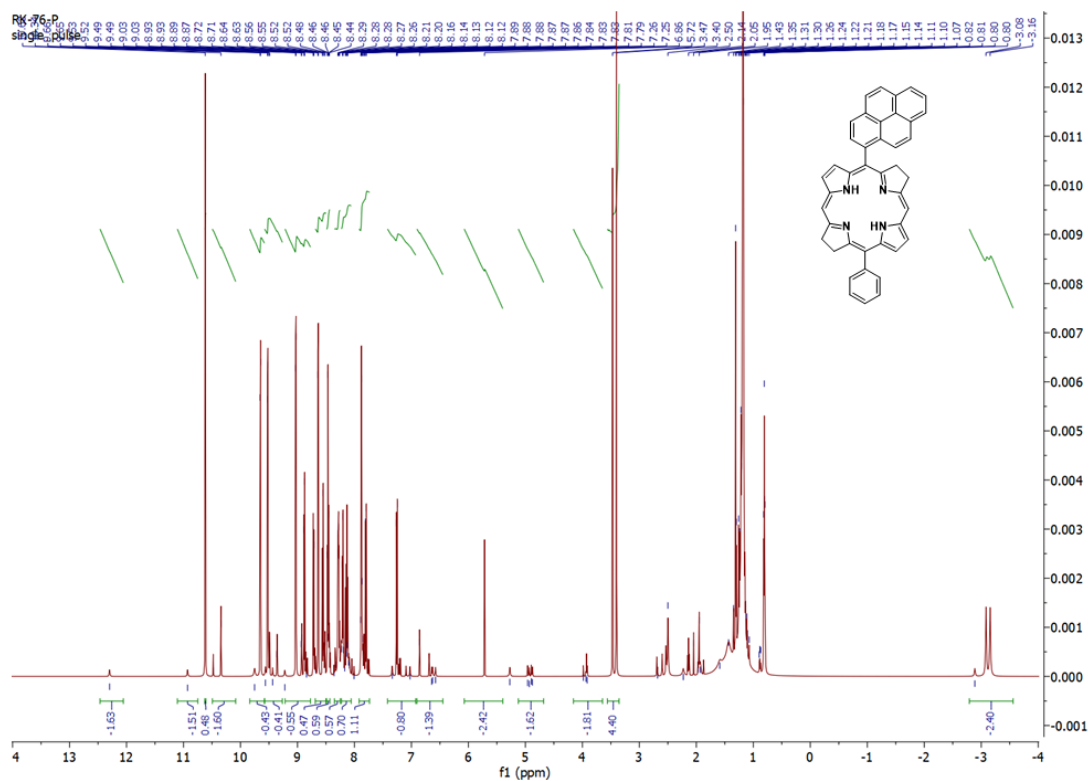

**Figure S6.** <sup>1</sup>H-NMR spectrum of pyrene-bacteriochlorin (**9b**).

### S3.2 Mass spectra

PyDPM (**3**): HPLC-MS: (C<sub>25</sub>H<sub>18</sub>N<sub>2</sub>) m/z [M]<sup>+</sup> calc. 346.15; found 346.15.

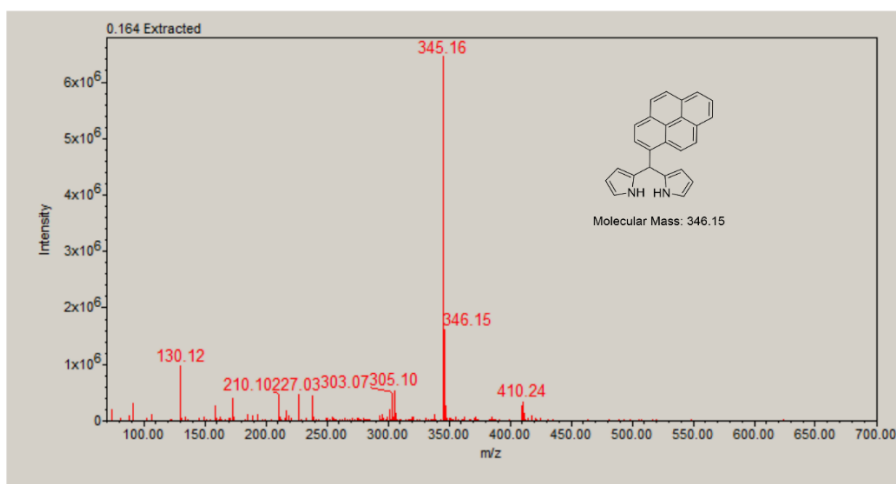

**Figure S7.** HPLC-MS spectrum of meso-pyrene dipyrromethane (**3**).



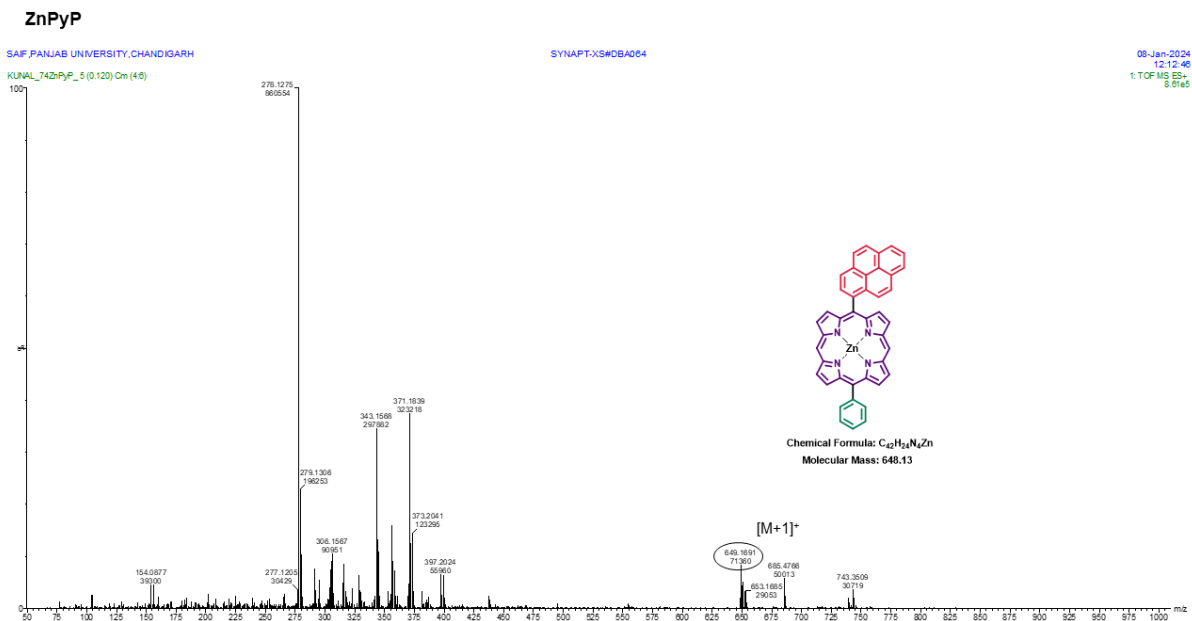

*Figur*

*e S8.* ESI-MS spectrum of ZnPyP (7).

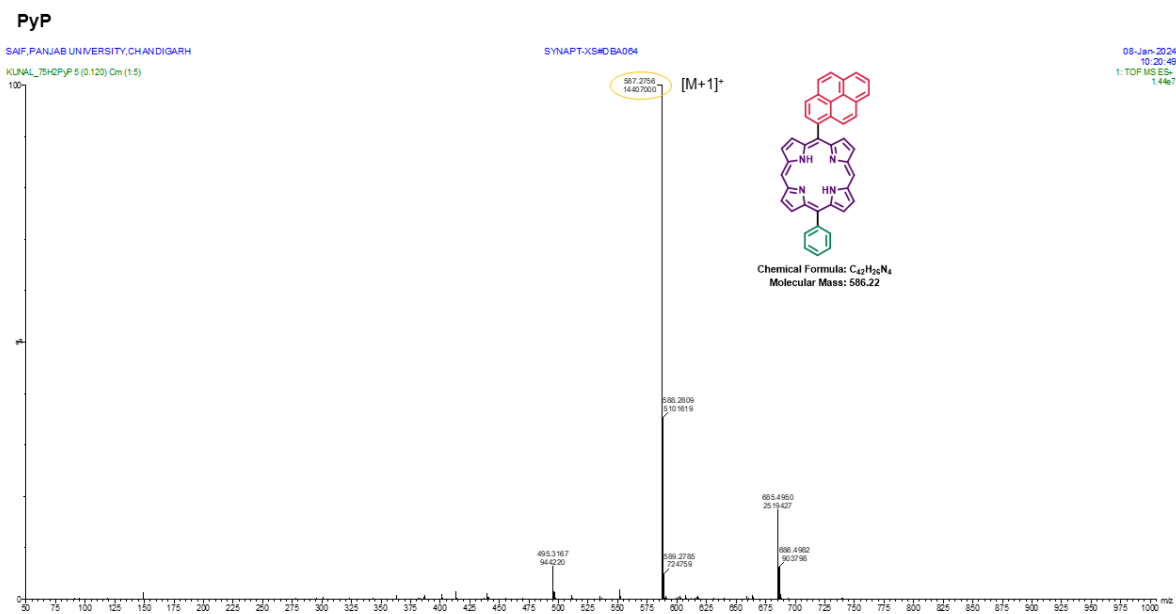

*Figure S9.* ESI-MS spectrum of PyP (8).



study. The detection was executed using the Waters eλ PDA detector at a temperature of 30°C and a wavelength range of 200-800 nm. HPLC analysis was performed isocratically in 0.1% TFA in the acetonitrile and water composition (9:1) run for ZnPyP, PyP, and PyChl. Only acetonitrile and water composition (9.5:5) was used for PyBac. The flow rate for all the samples was 1 mL/min.

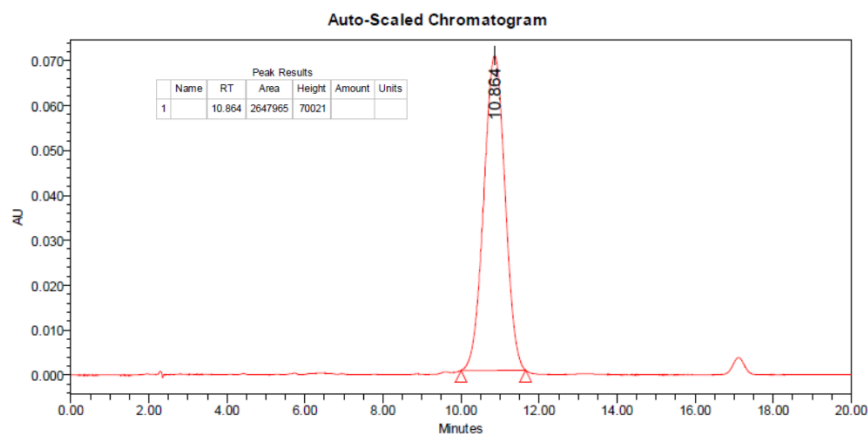

**Figure S12.** HPLC data of ZnPyP (**7**).  $t_R = 10.86$  [the analysis was performed isocratically in 0.1% TFA in the acetonitrile and water composition (90:10) run over 20 min, purity >99%].

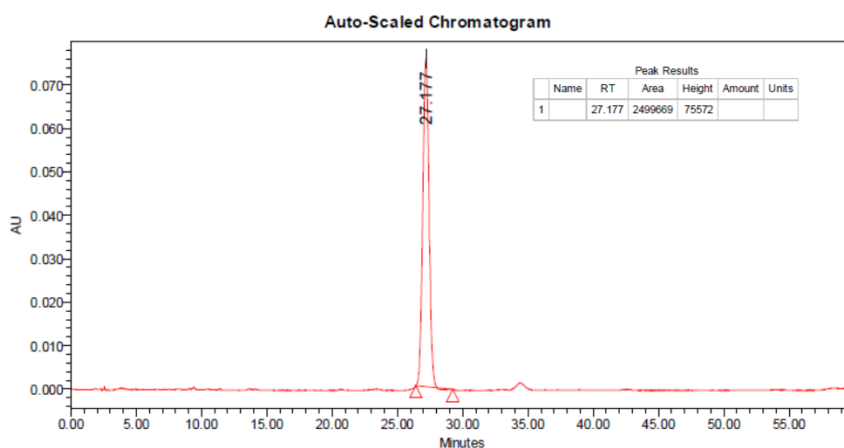

**Figure S13.** HPLC data of PyP (**8**).  $t_R = 27.18$  [the analysis was performed isocratically in 0.1% TFA in the acetonitrile and water composition (90:10) run over 60 min, purity >99%].

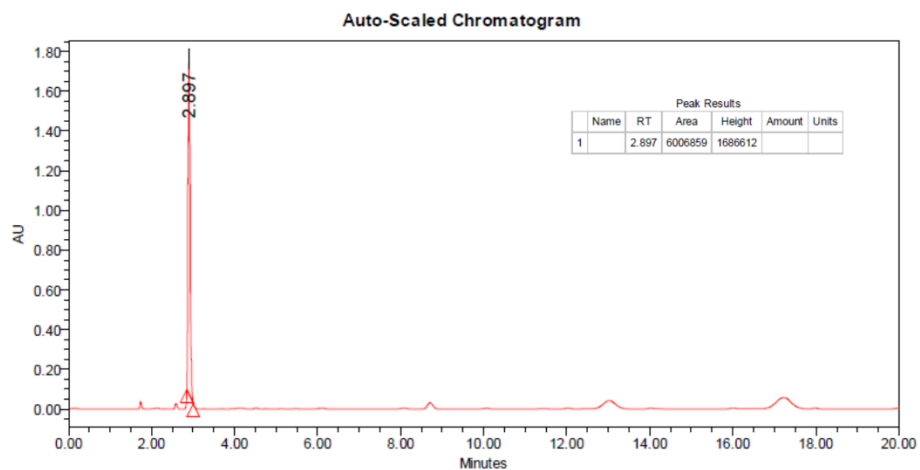

**Figure S14.** HPLC data of PyChl (**9a**).  $t_R = 2.89$  [the analysis was performed isocratically in 0.1% TFA in the acetonitrile and water composition (90:10) run over 20 min, purity >99%].

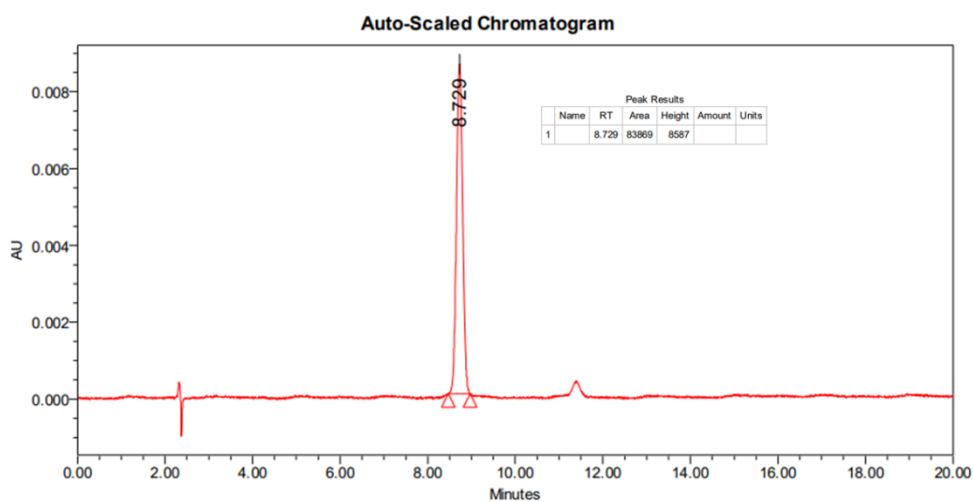

**Figure S15.** HPLC data of PyBac (**9b**).  $t_R = 8.72$  [the analysis was performed isocratically in the acetonitrile and water composition (95:5) run over 20 min, purity >98%].

### S3.4 UV-Vis spectra

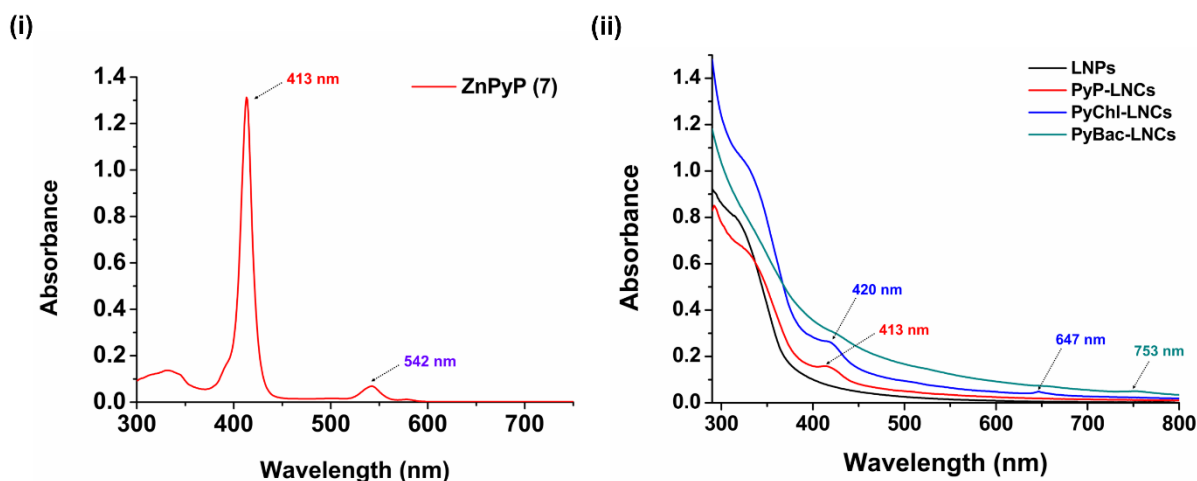

*Figur*

*e S16.* (i) UV-Vis spectra of ZnPyP (7), and (ii) UV-Vis spectra of LNPs, PyP-LNCs, PyChl-LNCs, and PyBac-LNCs.

### S3.5 Mean particle size and zeta potential

**Table S2.** Characterization data of pyrene-porphyrin-loaded lignin nanoparticles (PyP-LNCs), pyrene-chlorin-loaded lignin nanoparticles (PyChl-LNCs) and pyrene-bacteriochlorin-loaded lignin nanoparticles

| Nanoparticles | Mean particle size (Z-average in nm) | Polydispersity index (PDI) | Zeta potential (mV) |
|---------------|--------------------------------------|----------------------------|---------------------|
| LNPs          | 74 ± 2                               | 0.171 ± 0.004              | -30 ± 1             |
| PyP-LNCs      | 112 ± 4                              | 0.233 ± 0.005              | -31 ± 1             |
| PyChl-LNCs    | 126 ± 3                              | 0.055 ± 0.01               | -29 ± 2             |
| PyBac-LNCs    | 115 ± 6                              | 0.096 ± 0.005              | -34 ± 3             |

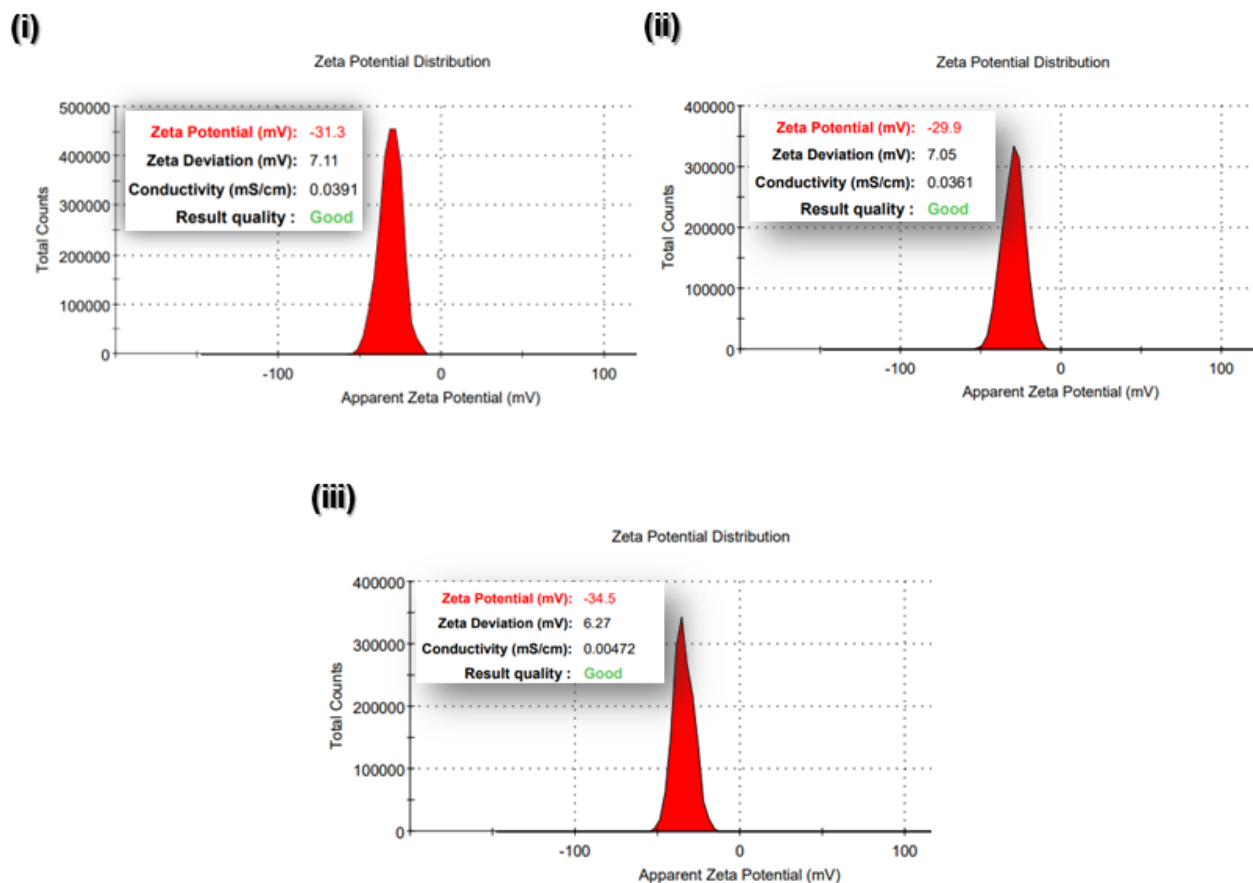

**Figure S17.** Zeta potential of nano-formulations: (i) PyP-LNCs, (ii) PyChl-LNCs, (iii) PyBac-LNCs.

### S3.6 Loading efficiency (%)

The standard calibration curves of the photosensitizer were prepared, and linear regression equations were obtained. The supernatant containing photosensitizer was determined by UV-Vis spectroscopy.

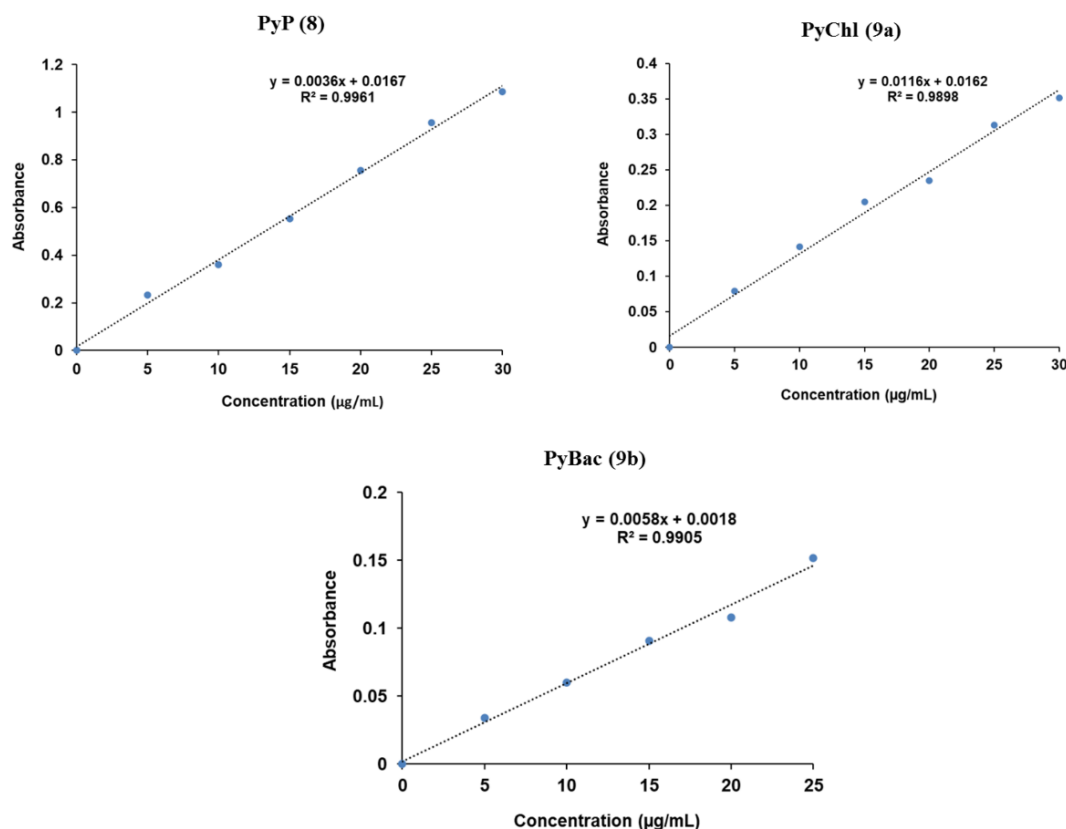

**Figure S18.** Standard calibration curves of PyP, PyChl, and PyBac recorded by UV-Vis spectroscopy.

**Calculation:**

The loading efficiency (%) of each nanoformulations (PyP-LNCs, PyChl-LNCs and PyBac-LNCs) were assessed by the following equation (1)

$$\text{Loading efficiency \%} = [(\text{Total drug added} - \text{free drug in supernatant}) / \text{Total drug added}] \times 100 \quad (1)$$

**Table S3.** % Loading analysis of different photosensitizers (8, 9a, 9b) in lignin nanoparticles

| Nanoparticles | % Loading |    |    | Mean (%) | SD   |
|---------------|-----------|----|----|----------|------|
|               | S1        | S2 | S3 |          |      |
| PyP-LNCs      | 95        | 94 | 93 | 94       | 1    |
| PyChl-LNCs    | 90        | 90 | 91 | 90.33    | 0.47 |
| PyBac-LNCs    | 91        | 89 | 90 | 90       | 0.81 |

**S3.7 Stability studies**

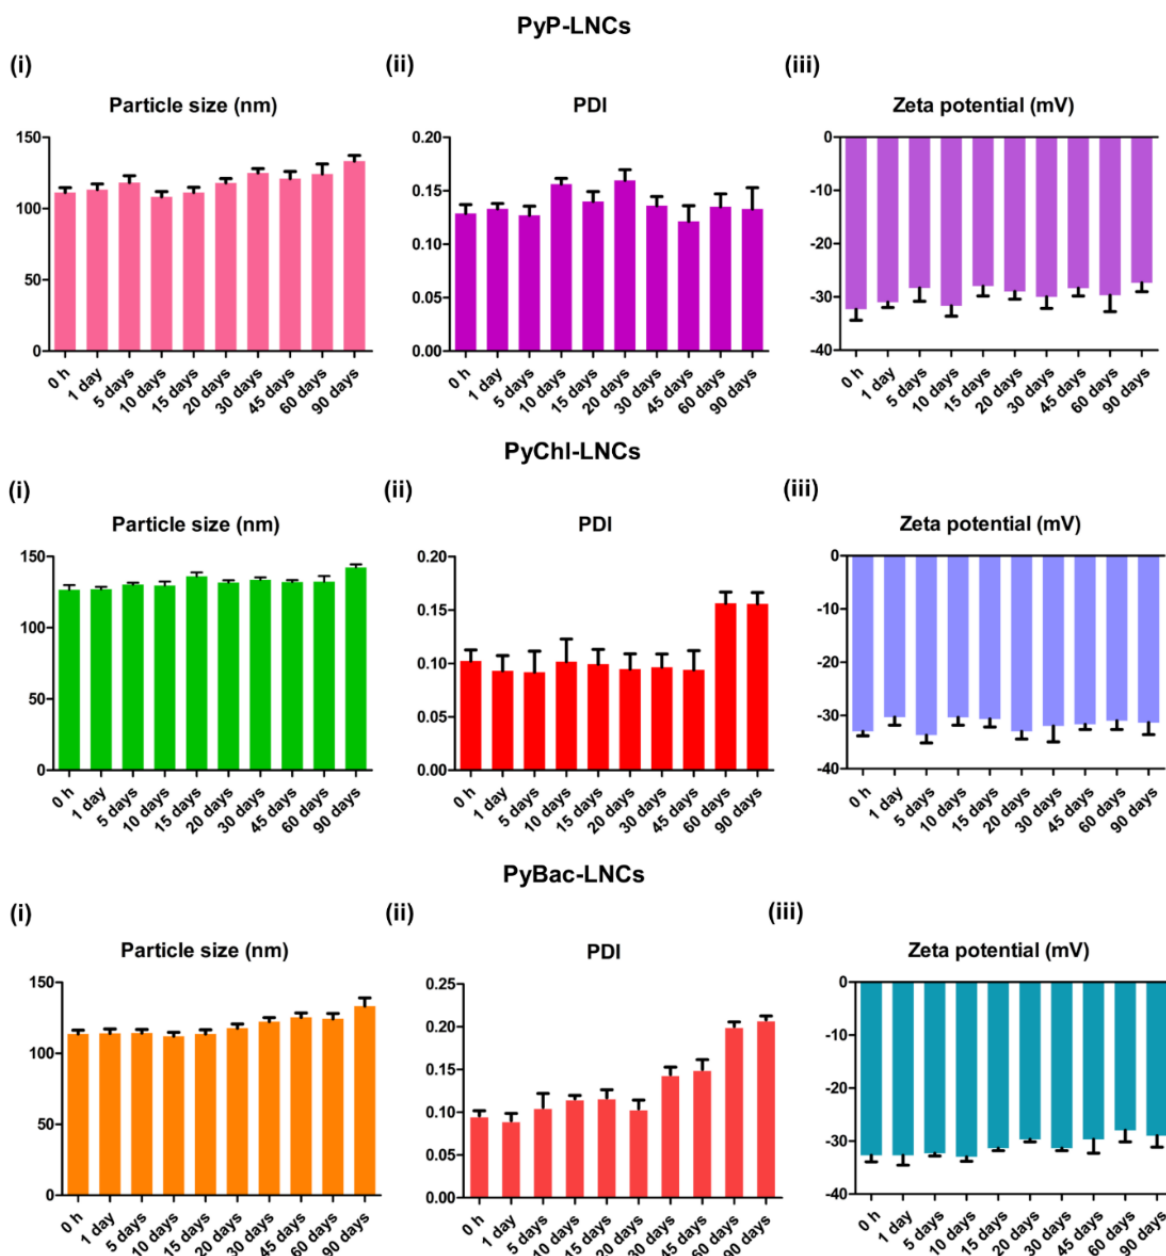

**Figure S19.** Stability study of the nanoformulations (PyP-LNCs, PyChl-LNCs, and PyBac-LNCs) in terms of (i) mean particle size, (ii) polydispersity index (PDI), and (iii) zeta potential up to 90 days.



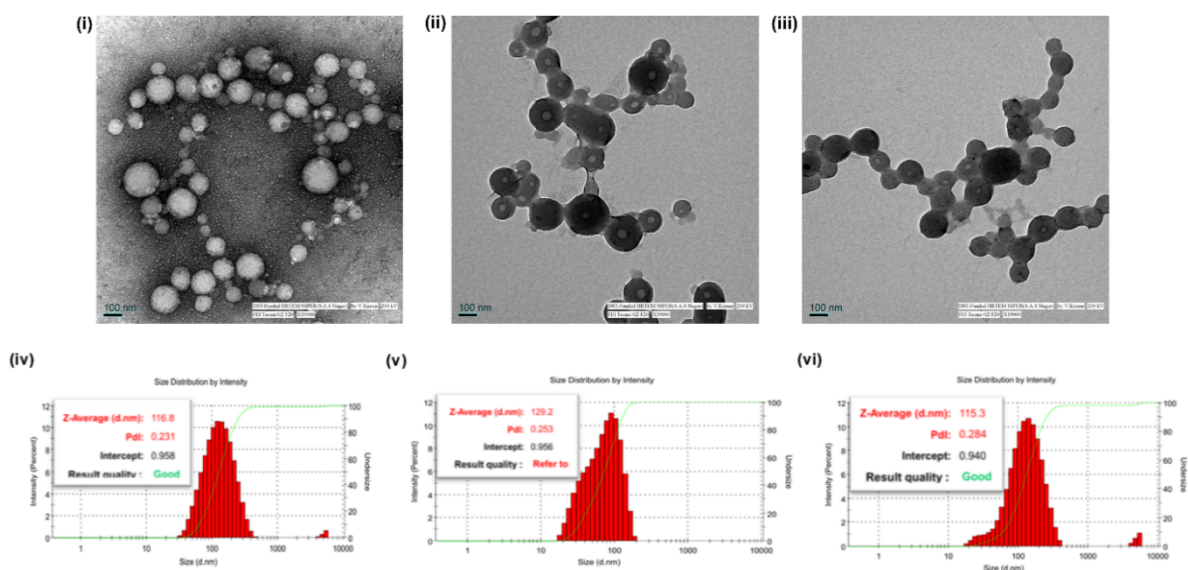

**Figure S20.** Stability studies of the nanoformulations (i) PyP-LNCs, (ii) PyChl-LNCs, and (iii) PyBac-LNCs; morphology of nanoparticles, the morphology was observed using transmission electron microscopy (TEM) and DLS data/mean particle size of nano-formulations: (iv) PyP-LNCs, (ii) PyChl-LNCs, and (vi) PyBac-LNCs after 1 month storage at 4 °C

#### S4. Singlet oxygen quantification graphs

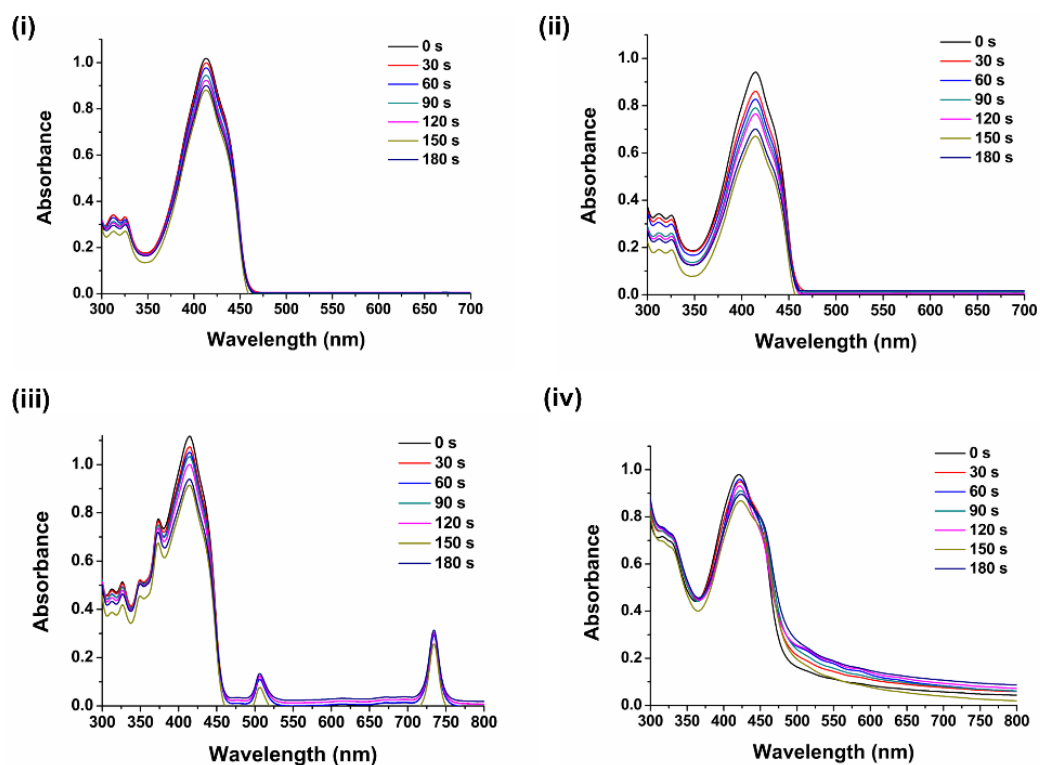

**Figure S21.** Singlet oxygen-mediated degradation of DPBF upon 30 s time interval exposure to the green LED (12 W; 500-570 nm, 32,400 J/cm<sup>2</sup>)/red LED (12 W; 620-750 nm, 32,400 J/cm<sup>2</sup>): (i) graph

represents the DPBF absorbance upon 30 s exposure with PyP (**8**) porphyrin under green LED, (ii) reduction in DPBF absorbance after exposure with PyChl (**9a**) under red LED, (iii) absorbance of DPBF solutions after exposure with PyBac (**9b**) under green LED, and (iv) absorbance of DPBF after exposure with PyP-LNCs under red LED.

## S5. Photoluminescence studies

**Table S4.** Fluorescence quantum yield calculations of **8**, **9a**, and **9b** by standard relative method

| Photosensitizer     | Integrated intensity<br>(n=3) | Absorbance at<br>excitation<br>wavelength (n=3) | Fluorescence<br>quantum yield ( $\phi_F$ ) |
|---------------------|-------------------------------|-------------------------------------------------|--------------------------------------------|
| PyP ( <b>8</b> )    | $7111 \pm 7$                  | $0.158 \pm 0.01$                                | $0.55 \pm 0.07$                            |
| PyChl ( <b>9a</b> ) | $7108 \pm 5$                  | $0.175 \pm 0.02$                                | $0.85 \pm 0.12$                            |
| PyBac ( <b>9b</b> ) | $7669 \pm 11$                 | $0.113 \pm 0.01$                                | $0.66 \pm 0.03$                            |
| ZnPc (ref)          | 8279                          | 0.37                                            | -                                          |

(**8**):  $\lambda_{ex} = 418$  nm, (**9a**):  $\lambda_{ex} = 406$  nm, and (**9b**):  $\lambda_{ex} = 507$  nm

## S6. Morphological observation of *Candida albicans* before and after treatment

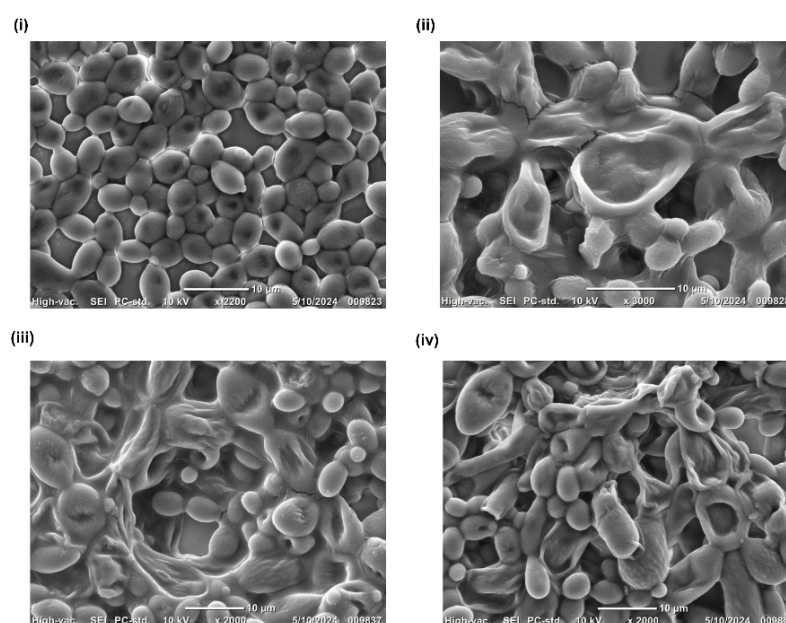

**Figure S22.** (i) Morphology of *C. albicans* cells without any treatment, (ii) structural changes in *C. albicans* cells after treatment with PyP-LNCs under green LED (12 W; 500-570 nm, 32,400 J/cm<sup>2</sup>), (iii) *C. albicans* cells after treatment with PyChl-LNCs under red LED (12 W; 620-750 nm, 32,400 J/cm<sup>2</sup>), and (iv) *C. albicans* cells after treatment with PyBac-LNCs under red LED (12 W).

## S7. Intracellular ROS generation analysis

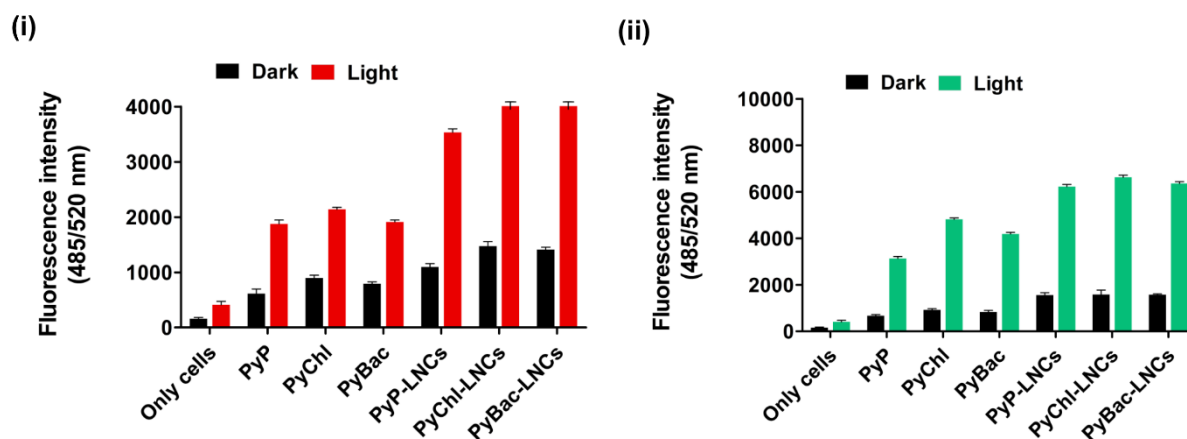

**Figure S23.** ROS generation analysis with nanolignin sensitzers (PyP-LNCs, PyChl-LNCs, and PyBac-LNCs) under light and dark conditions: (i) 5 µg/mL, and (ii) 10 µg/mL.

## References

1. S. Paul, N. S. Thakur, S. Chandna, Y. N. Reddy and J. Bhaumik, *J Mater Chem B*, 2021, **9**, 1592–1603.
2. Y. N. Reddy, N. Singh Thakur and J. Bhaumik, *ChemNanoMat*, 2020, **6**, 239–247.
3. K. Gogde, S. Paul, A. K. Pujari, A. K. Yadav and J. Bhaumik, *J Med Chem*, 2023, **66**, 13058–13071.
